# Supplementary material for: Ab initio calculations of the spectra and lifetimes of the lead dimer
Source: Royal Society of Chemistry journal article supplement (doi:10.1039/d3cp05990a), 2024-01-01
Supplement: d3cp05990a1.pdf [file d3cp05990a1.pdf]

***Ab Initio calculations of the spectra and lifetimes of the Lead dimer***

Lidan Xiao<sup>1</sup>, Boris F. Minaev<sup>23\*</sup>, Hans Ågren<sup>3</sup>, Bing Yan<sup>a\*</sup>

---

<sup>1</sup>*Institute of Atomic and Molecular Physics, Jilin University, Changchun 130012, China;*

<sup>2</sup>*Department of Chemistry and Nanomaterials Science, Bohdan Khmelnytsky National University, 18031Cherkasy,Ukraine*

<sup>3</sup>*Department of Physics and Astronomy, Uppsala University, 752 36 Uppsala, Sweden*

**Table S1a.** The potential energy curves of the  $\Lambda$ -S states for  $\text{Pb}_2(\text{cm}^{-1})$ .

| R(Å)   | $b^1\Sigma_g^+$ | $a^1\Delta_g$ | $d^1\Sigma_g^+$ | $c^1\Pi_u$ | $1^1\Pi_g$ | $1^1\Sigma_u^-$ | $1^5\Sigma_g^+$ | $2^5\Sigma_g^+$ | $1^5\Pi_u$ |
|--------|-----------------|---------------|-----------------|------------|------------|-----------------|-----------------|-----------------|------------|
| 1.601  | 278903          | 329425        | 333944          | 303033     | 330803     | 322990          | 345370          | 355134          | 366586     |
| 1.701  | 181810          | 223638        | 227970          | 201765     | 231803     | 222620          | 244021          | 252519          | 265656     |
| 1.801  | 119009          | 153378        | 157565          | 135319     | 167654     | 157418          | 176304          | 184389          | 197821     |
| 1.85   | 96641           | 127668        | 131797          | 111320     | 143679     | 133153          | 151174          | 159966          | 169884     |
| 1.9    | 78124           | 105870        | 109941          | 91205      | 123033     | 113258          | 130414          | 140047          | 147186     |
| 1.95   | 63088           | 87788         | 91811           | 74661      | 104514     | 96909           | 113141          | 123711          | 128228     |
| 2      | 50903           | 72725         | 76706           | 61049      | 89164      | 83446           | 98726           | 110345          | 112281     |
| 2.05   | 41052           | 60151         | 64095           | 49845      | 76535      | 72345           | 86649           | 99429           | 98801      |
| 2.1    | 33115           | 49632         | 53545           | 40618      | 65989      | 63176           | 76500           | 90531           | 87357      |
| 2.15   | 26745           | 40816         | 44705           | 33020      | 57118      | 55589           | 67945           | 83304           | 77602      |
| 2.2    | 21673           | 33378         | 37254           | 26717      | 49562      | 49265           | 60711           | 77446           | 69214      |
| 2.25   | 17676           | 27241         | 31117           | 21680      | 43342      | 43965           | 54594           | 72793           | 62043      |
| 2.301  | 14462           | 22013         | 25900           | 17512      | 38000      | 39218           | 49301           | 69020           | 55742      |
| 2.35   | 12040           | 17828         | 21752           | 14270      | 33665      | 34969           | 44968           | 66139           | 50510      |
| 2.4    | 10117           | 14303         | 18298           | 11643      | 29963      | 30900           | 41191           | 63823           | 45894      |
| 2.45   | 8631            | 11421         | 15541           | 9598       | 26879      | 27235           | 37967           | 61940           | 41904      |
| 2.5    | 7492            | 9110          | 13423           | 8070       | 24340      | 24041           | 35219           | 59763           | 38467      |
| 2.5501 | 6645            | 7337          | 11928           | 7032       | 22318      | 21331           | 32899           | 54998           | 35542      |
| 2.6    | 5914            | 5899          | 10864           | 6248       | 20567      | 19004           | 30904           | 51313           | 32978      |
| 2.65   | 5297            | 4778          | 10206           | 5724       | 19169      | 17025           | 29197           | 48190           | 30744      |
| 2.701  | 4778            | 3922          | 9870            | 5412       | 17975      | 15328           | 27680           | 45374           | 28762      |
| 2.75   | 4423            | 3367          | 9811            | 5320       | 17077      | 13994           | 26423           | 42852           | 27142      |
| 2.79   | 4202            | 3042          | 9885            | 5340       | 16458      | 13061           | 25516           | 41044           | 25955      |
| 2.85   | 4021            | 2776          | 10166           | 5533       | 15732      | 11924           | 24344           | 38575           | 24417      |
| 2.9    | 3996            | 2726          | 10504           | 5809       | 15278      | 11189           | 23510           | 36722           | 23326      |
| 2.95   | 4075            | 2805          | 10906           | 6169       | 14940      | 10616           | 22790           | 35033           | 22382      |
| 3      | 4243            | 2991          | 11349           | 6593       | 14696      | 10186           | 22167           | 33492           | 21566      |
| 3.05   | 4487            | 3270          | 11812           | 7067       | 14534      | 9879            | 21625           | 32078           | 20861      |
| 3.102  | 4809            | 3634          | 12302           | 7594       | 14430      | 9670            | 21135           | 30740           | 20231      |
| 3.15   | 5154            | 4025          | 12745           | 8096       | 14380      | 9565            | 20738           | 29609           | 19729      |
| 3.2    | 5553            | 4477          | 13193           | 8630       | 14367      | 9530            | 20372           | 28530           | 19274      |
| 3.25   | 5983            | 4962          | 13618           | 9165       | 14382      | 9560            | 20049           | 27540           | 18881      |
| 3.3    | 6438            | 5474          | 14020           | 9694       | 14424      | 9646            | 19764           | 26631           | 18543      |
| 3.35   | 6909            | 6003          | 14395           | 10214      | 14481      | 9778            | 19509           | 25799           | 18252      |
| 3.4    | 7390            | 6543          | 14740           | 10717      | 14553      | 9949            | 19283           | 25038           | 18001      |
| 3.451  | 7887            | 7100          | 15063           | 11213      | 14637      | 10153           | 19079           | 24324           | 17780      |
| 3.5    | 8364            | 7633          | 15341           | 11667      | 14720      | 10377           | 18901           | 23694           | 17600      |
| 3.55   | 8848            | 8173          | 15600           | 12106      | 14812      | 10623           | 18739           | 23106           | 17442      |
| 3.6    | 9326            | 8704          | 15831           | 12521      | 14905      | 10882           | 18594           | 22569           | 17308      |
| 3.65   | 9793            | 9222          | 16035           | 12909      | 14997      | 11154           | 18462           | 22075           | 17196      |

|       |       |       |       |       |       |       |       |       |       |
|-------|-------|-------|-------|-------|-------|-------|-------|-------|-------|
| 3.701 | 10259 | 9740  | 16221 | 13278 | 15089 | 11439 | 18341 | 21614 | 17099 |
| 3.75  | 10691 | 10217 | 16377 | 13605 | 15179 | 11716 | 18236 | 21208 | 17022 |
| 3.8   | 11117 | 10688 | 16520 | 13915 | 15267 | 11999 | 18140 | 20830 | 16957 |
| 3.85  | 11526 | 11141 | 16645 | 14200 | 15352 | 12280 | 18052 | 20486 | 16904 |
| 3.91  | 11995 | 11654 | 16774 | 14512 | 15451 | 12615 | 17960 | 20110 | 16856 |
| 3.94  | 12219 | 11900 | 16832 | 14657 | 15515 | 12833 | 17916 | 19939 | 16832 |
| 4     | 12648 | 12370 | 16935 | 14922 | 15594 | 13100 | 17839 | 19623 | 16810 |
| 4.1   | 13305 | 13085 | 17077 | 15308 | 15743 | 13614 | 17729 | 19171 | 16788 |
| 4.202 | 13900 | 13730 | 17189 | 15638 | 15890 | 14101 | 17644 | 18798 | 16790 |
| 4.301 | 14410 | 14279 | 17279 | 15910 | 16024 | 14534 | 17578 | 18504 | 16810 |
| 4.4   | 14857 | 14755 | 17352 | 16140 | 16151 | 14926 | 17527 | 18269 | 16845 |
| 4.5   | 15250 | 15174 | 17411 | 16338 | 16274 | 15282 | 17488 | 18078 | 16886 |
| 4.6   | 15589 | 15532 | 17459 | 16507 | 16388 | 15598 | 17457 | 17929 | 16935 |
| 4.7   | 15879 | 15839 | 17499 | 16652 | 16494 | 15872 | 17435 | 17810 | 16985 |
| 4.8   | 16126 | 16098 | 17529 | 16774 | 16590 | 16112 | 17418 | 17718 | 17036 |
| 4.9   | 16335 | 16316 | 17554 | 16880 | 16678 | 16318 | 17402 | 17646 | 17082 |
| 5.01  | 16527 | 16518 | 17573 | 16976 | 16766 | 16511 | 17389 | 17582 | 17130 |
| 5.1   | 16659 | 16654 | 17582 | 17042 | 16829 | 16645 | 17382 | 17543 | 17165 |
| 5.201 | 16784 | 16783 | 17591 | 17106 | 16893 | 16772 | 17374 | 17507 | 17200 |
| 5.3   | 16889 | 16884 | 17593 | 17156 | 16948 | 16878 | 17367 | 17479 | 17231 |
| 5.4   | 16978 | 16970 | 17593 | 17200 | 16998 | 16968 | 17365 | 17459 | 17259 |
| 5.5   | 17051 | 17040 | 17591 | 17238 | 17042 | 17042 | 17360 | 17442 | 17281 |
| 5.6   | 17112 | 17099 | 17589 | 17268 | 17082 | 17106 | 17358 | 17428 | 17303 |
| 5.7   | 17162 | 17148 | 17582 | 17295 | 17117 | 17159 | 17358 | 17420 | 17321 |
| 5.8   | 17204 | 17187 | 17578 | 17317 | 17148 | 17202 | 17358 | 17411 | 17336 |
| 5.9   | 17239 | 17222 | 17571 | 17334 | 17176 | 17240 | 17360 | 17407 | 17352 |
| 6     | 17268 | 17251 | 17565 | 17352 | 17200 | 17273 | 17363 | 17404 | 17365 |
| 7     | 17413 | 17398 | 17527 | 17450 | 17371 | 17437 | 17411 | 17428 | 17453 |
| 8     | 17467 | 17457 | 17521 | 17503 | 17461 | 17499 | 17459 | 17470 | 17505 |
| 9     | 17489 | 17481 | 17516 | 17527 | 17503 | 17525 | 17483 | 17490 | 17529 |
| 10    | 17496 | 17492 | 17512 | 17536 | 17523 | 17536 | 17492 | 17499 | 17538 |

**Table S1b.** The potential energy curves of the  $\Lambda$ -S states for  $\text{Pb}_2(\text{cm}^{-1})$ .

| R(Å)   | $1^5\Delta_u$ | $1^5\Delta_g$ | $1^5\Sigma_u^-$ | $A^3\Pi_u$ | $X^3\Sigma_g^-$ | $1^3\Sigma_u^+$ | $2^3\Sigma_u^+$ | $D^3\Pi_g$ | $1^3\Delta_u$ |
|--------|---------------|---------------|-----------------|------------|-----------------|-----------------|-----------------|------------|---------------|
| 1.601  | 351517        | 333924        | 351001          | 297272     | 324070          | 312317          | 358764          | 330588     | 317938        |
| 1.701  | 250232        | 228868        | 247199          | 197099     | 218610          | 212480          | 254703          | 232283     | 218728        |
| 1.801  | 184453        | 159731        | 179096          | 130585     | 148613          | 147101          | 185785          | 164597     | 152963        |
| 1.85   | 160032        | 133675        | 153516          | 106559     | 123020          | 123514          | 160416          | 138653     | 129224        |
| 1.9    | 140115        | 112092        | 132405          | 86447      | 101329          | 103765          | 137479          | 117136     | 109333        |
| 1.95   | 123779        | 94172         | 114875          | 69900      | 83348           | 87544           | 117948          | 99253      | 92985         |
| 2      | 110413        | 79235         | 100300          | 56293      | 68384           | 74198           | 101468          | 84342      | 79529         |
| 2.05   | 99497         | 66753         | 88174           | 45102      | 55902           | 63213           | 87520           | 71878      | 68437         |
| 2.1    | 90599         | 56302         | 78122           | 35897      | 45473           | 54164           | 75681           | 61431      | 59291         |
| 2.15   | 83372         | 47534         | 69872           | 28332      | 36744           | 46711           | 65608           | 52659      | 51743         |
| 2.2    | 77514         | 40140         | 63626           | 22095      | 29388           | 40579           | 57781           | 45245      | 45510         |
| 2.25   | 72861         | 33994         | 57658           | 17095      | 23335           | 35553           | 50475           | 39088      | 40388         |
| 2.301  | 69088         | 28747         | 52768           | 12962      | 18192           | 31339           | 44049           | 33823      | 36055         |
| 2.35   | 66207         | 24520         | 48932           | 9756       | 14090           | 28007           | 38764           | 29576      | 32561         |
| 2.4    | 63889         | 20920         | 45447           | 7159       | 10653           | 25207           | 34163           | 25955      | 29493         |
| 2.45   | 62002         | 17940         | 42295           | 5144       | 7864            | 22907           | 30257           | 22950      | 26736         |
| 2.5    | 59813         | 15497         | 39260           | 3639       | 5645            | 21019           | 26978           | 20490      | 24153         |
| 2.5501 | 55020         | 13557         | 36090           | 2616       | 3968            | 19487           | 24291           | 18530      | 21728         |
| 2.6    | 51333         | 11948         | 33795           | 1857       | 2625            | 18137           | 22097           | 16900      | 19566         |
| 2.65   | 48219         | 10649         | 31879           | 1363       | 1600            | 16908           | 20378           | 15572      | 17712         |
| 2.701  | 45409         | 9598          | 30219           | 1086       | 843             | 15736           | 19075           | 14492      | 16061         |
| 2.75   | 42894         | 8845          | 28740           | 1036       | 393             | 14714           | 18199           | 13713      | 14749         |
| 2.79   | 41088         | 8351          | 27750           | 1091       | 147             | 13941           | 17674           | 13197      | 13825         |
| 2.85   | 38619         | 7822          | 26444           | 1339       | 0               | 12942           | 17132           | 12633      | 12694         |
| 2.9    | 36769         | 7541          | 25501           | 1666       | 48              | 12262           | 16840           | 12321      | 11959         |
| 2.95   | 35079         | 7385          | 24671           | 2083       | 228             | 11720           | 16654           | 12128      | 11384         |
| 3      | 33538         | 7333          | 23936           | 2572       | 516             | 11301           | 16544           | 12036      | 10950         |
| 3.05   | 32127         | 7368          | 23286           | 3117       | 895             | 10991           | 16494           | 12029      | 10638         |
| 3.102  | 30786         | 7480          | 22687           | 3727       | 1365            | 10776           | 16483           | 12091      | 10425         |
| 3.15   | 29655         | 7636          | 22198           | 4310       | 1855            | 10660           | 16502           | 12198      | 10315         |
| 3.2    | 28576         | 7842          | 21741           | 4934       | 2410            | 10612           | 16540           | 12352      | 10278         |
| 3.25   | 27586         | 8085          | 21333           | 5568       | 2998            | 10627           | 16590           | 12536      | 10304         |
| 3.3    | 26677         | 8358          | 20964           | 6205       | 3615            | 10695           | 16652           | 12743      | 10388         |
| 3.35   | 25845         | 8654          | 20635           | 6839       | 4247            | 10811           | 16715           | 12967      | 10517         |
| 3.4    | 25082         | 8966          | 20334           | 7464       | 4892            | 10965           | 16783           | 13199      | 10686         |
| 3.451  | 24368         | 9297          | 20058           | 8092       | 5557            | 11154           | 16851           | 13441      | 10893         |
| 3.5    | 23741         | 9622          | 19816           | 8680       | 6196            | 11360           | 16913           | 13671      | 11114         |
| 3.55   | 23150         | 9960          | 19593           | 9262       | 6843            | 11590           | 16976           | 13904      | 11360         |
| 3.6    | 22612         | 10296         | 19386           | 9824       | 7482            | 11836           | 17033           | 14128      | 11623         |
| 3.65   | 22119         | 10634         | 19197           | 10364      | 8110            | 12095           | 17086           | 14343      | 11896         |

|       |       |       |       |       |       |       |       |       |       |
|-------|-------|-------|-------|-------|-------|-------|-------|-------|-------|
| 3.701 | 21658 | 10972 | 19020 | 10888 | 8735  | 12365 | 17137 | 14551 | 12181 |
| 3.75  | 21252 | 11292 | 18862 | 11367 | 9319  | 12629 | 17180 | 14740 | 12460 |
| 3.8   | 20874 | 11612 | 18715 | 11830 | 9896  | 12896 | 17222 | 14922 | 12743 |
| 3.85  | 20527 | 11924 | 18579 | 12264 | 10451 | 13164 | 17257 | 15091 | 13026 |
| 3.91  | 20152 | 12286 | 18429 | 12749 | 11090 | 13482 | 17297 | 15280 | 13359 |
| 3.94  | 19926 | 12521 | 18337 | 12978 | 11395 | 13636 | 17317 | 15368 | 13522 |
| 4     | 19665 | 12804 | 18232 | 13403 | 11979 | 13939 | 17349 | 15534 | 13840 |
| 4.1   | 19215 | 13340 | 18047 | 14027 | 12872 | 14417 | 17398 | 15782 | 14343 |
| 4.202 | 18840 | 13840 | 17892 | 14560 | 13669 | 14861 | 17439 | 16002 | 14808 |
| 4.301 | 18546 | 14281 | 17771 | 14992 | 14338 | 15245 | 17477 | 16191 | 15214 |
| 4.4   | 18311 | 14681 | 17674 | 15350 | 14905 | 15583 | 17510 | 16357 | 15570 |
| 4.5   | 18120 | 15041 | 17600 | 15651 | 15379 | 15879 | 17538 | 16507 | 15881 |
| 4.6   | 17971 | 15361 | 17540 | 15901 | 15767 | 16131 | 17562 | 16636 | 16149 |
| 4.7   | 17852 | 15644 | 17497 | 16112 | 16079 | 16344 | 17584 | 16750 | 16373 |
| 4.8   | 17760 | 15890 | 17464 | 16289 | 16331 | 16522 | 17600 | 16851 | 16559 |
| 4.9   | 17685 | 16103 | 17439 | 16441 | 16531 | 16676 | 17611 | 16937 | 16713 |
| 5.01  | 17624 | 16305 | 17420 | 16579 | 16706 | 16814 | 17619 | 17018 | 16853 |
| 5.1   | 17584 | 16445 | 17407 | 16678 | 16823 | 16906 | 17622 | 17075 | 16946 |
| 5.201 | 17547 | 16581 | 17398 | 16772 | 16928 | 16994 | 17622 | 17130 | 17033 |
| 5.3   | 17521 | 16695 | 17391 | 16851 | 17011 | 17062 | 17619 | 17174 | 17104 |
| 5.4   | 17499 | 16794 | 17387 | 16919 | 17080 | 17121 | 17615 | 17213 | 17161 |
| 5.5   | 17481 | 16878 | 17385 | 16979 | 17137 | 17167 | 17608 | 17246 | 17207 |
| 5.6   | 17468 | 16948 | 17385 | 17029 | 17183 | 17207 | 17602 | 17273 | 17246 |
| 5.7   | 17459 | 17009 | 17385 | 17073 | 17222 | 17240 | 17593 | 17297 | 17279 |
| 5.8   | 17453 | 17062 | 17387 | 17112 | 17253 | 17266 | 17587 | 17317 | 17306 |
| 5.9   | 17448 | 17108 | 17389 | 17145 | 17281 | 17288 | 17578 | 17334 | 17330 |
| 6     | 17444 | 17145 | 17391 | 17176 | 17303 | 17308 | 17569 | 17349 | 17347 |
| 7     | 17468 | 17367 | 17448 | 17365 | 17435 | 17413 | 17523 | 17446 | 17455 |
| 8     | 17510 | 17461 | 17499 | 17457 | 17494 | 17464 | 17516 | 17499 | 17503 |
| 9     | 17529 | 17505 | 17525 | 17499 | 17521 | 17483 | 17514 | 17523 | 17525 |
| 10    | 17538 | 17523 | 17534 | 17518 | 17529 | 17492 | 17507 | 17532 | 17534 |

**Table S2a.** The potential energy curves of the  $\Omega$  states for  $\text{Pb}_2(\text{cm}^{-1})$ .

| R(Å)  | $\chi^0_g^+$ | $b^1_{\Sigma_{g,0}^+}$ | $a^1_{\Delta_{g,2}}$ | R(Å)  | $2u(I)$ | $1_u(I)$ | $0_u^-(I)$ | $0^+u(I)$ | $1_u(II)$ |
|-------|--------------|------------------------|----------------------|-------|---------|----------|------------|-----------|-----------|
| 1.601 | 288060       | 324683                 | 334235               | 1.701 | 201021  | 201503   | 208704     | 210265    | 211639    |
| 1.701 | 191060       | 219684                 | 229523               | 1.801 | 134773  | 135368   | 142370     | 143706    | 145336    |
| 1.801 | 128348       | 150058                 | 159650               | 1.850 | 110876  | 111537   | 118395     | 119635    | 121383    |
| 1.9   | 87506        | 102784                 | 112053               | 1.900 | 90896   | 91577    | 98337      | 99469     | 101322    |
| 1.95  | 72433        | 84844                  | 93973                | 1.950 | 74546   | 75276    | 81826      | 82884     | 84828     |
| 2     | 60197        | 69946                  | 78900                | 2.000 | 61058   | 61773    | 68161      | 69204     | 71160     |
| 2.05  | 50267        | 57500                  | 66266                | 2.050 | 49981   | 50676    | 56906      | 57938     | 59895     |
| 2.1   | 42195        | 47146                  | 55671                | 2.100 | 40889   | 41564    | 47643      | 48660     | 50610     |

|       |       |       |       |       |       |       |       |       |       |
|-------|-------|-------|-------|-------|-------|-------|-------|-------|-------|
| 2.15  | 35532 | 38654 | 46780 | 2.150 | 33429 | 34079 | 40030 | 41017 | 42954 |
| 2.2   | 29634 | 32075 | 39272 | 2.200 | 27267 | 27881 | 33775 | 34711 | 36606 |
| 2.25  | 24130 | 27483 | 33078 | 2.250 | 22357 | 22955 | 28786 | 29612 | 31518 |
| 2.301 | 19224 | 24042 | 27816 | 2.301 | 18270 | 18832 | 24696 | 41734 | 27263 |
| 2.35  | 15227 | 21495 | 23606 | 2.350 | 15094 | 15622 | 21544 | 22092 | 23932 |
| 2.4   | 11859 | 19464 | 20051 | 2.400 | 12519 | 13012 | 18943 | 19411 | 21208 |
| 2.45  | 9121  | 17882 | 17076 | 2.450 | 10513 | 10969 | 16875 | 17312 | 19061 |
| 2.5   | 6940  | 16654 | 14742 | 2.501 | 9011  | 9429  | 15288 | 15725 | 17424 |
| 2.55  | 5281  | 15731 | 12946 | 2.550 | 7981  | 8352  | 14167 | 14625 | 16287 |
| 2.6   | 3935  | 14951 | 11503 | 2.600 | 7210  | 7532  | 13298 | 13792 | 15402 |
| 2.65  | 2788  | 14150 | 10503 | 2.650 | 6690  | 6958  | 12680 | 13222 | 14765 |
| 2.701 | 2010  | 14045 | 9527  | 2.701 | 6365  | 6585  | 12271 | 12864 | 14303 |
| 2.75  | 1392  | 13682 | 8899  | 2.750 | 6257  | 6423  | 12089 | 12726 | 14048 |
| 2.79  | 841   | 13440 | 8447  | 2.790 | 6298  | 6379  | 12036 | 12703 | 14006 |
| 2.85  | 265   | 12887 | 7988  | 2.850 | 6483  | 6480  | 12130 | 12821 | 13982 |
| 2.95  | 0     | 12313 | 7807  | 2.950 | 7110  | 6969  | 12349 | 13303 | 13369 |
| 3     | 71    | 12179 | 7899  | 3.000 | 7535  | 7300  | 11968 | 13632 | 12943 |
| 3.05  | 230   | 12123 | 8089  | 3.050 | 8013  | 7668  | 11436 | 13994 | 12559 |
| 3.102 | 468   | 12130 | 8359  | 3.102 | 8546  | 8068  | 10921 | 14376 | 12246 |
| 3.15  | 736   | 12181 | 8661  | 3.150 | 9058  | 8436  | 10621 | 14715 | 12093 |
| 3.2   | 1053  | 12268 | 9018  | 3.200 | 9603  | 8807  | 10435 | 15043 | 12045 |
| 3.25  | 1396  | 12383 | 9408  | 3.250 | 10154 | 9159  | 10334 | 15338 | 12085 |
| 3.3   | 1757  | 12517 | 9821  | 3.301 | 10711 | 9476  | 10294 | 15580 | 12197 |
| 3.35  | 2121  | 12664 | 10251 | 3.350 | 11244 | 9779  | 10301 | 15812 | 12365 |
| 3.4   | 2487  | 12818 | 10689 | 3.400 | 11771 | 10047 | 10345 | 15993 | 12581 |
| 3.451 | 2882  | 12977 | 11138 | 3.451 | 12290 | 10293 | 10420 | 16146 | 12837 |
| 3.5   | 3241  | 13131 | 11567 | 3.500 | 12767 | 10509 | 10513 | 16270 | 13105 |
| 3.55  | 3597  | 13287 | 11997 | 3.550 | 13228 | 10711 | 10625 | 16377 | 13392 |
| 3.6   | 3940  | 13448 | 12416 | 3.600 | 13660 | 10897 | 10750 | 16470 | 13686 |
| 3.65  | 4268  | 13636 | 12820 | 3.650 | 14059 | 11068 | 10883 | 16552 | 13982 |
| 3.701 | 4586  | 13447 | 13215 | 3.701 | 14434 | 11229 | 11024 | 16626 | 14279 |
| 3.75  | 4873  | 13612 | 13574 | 3.750 | 14762 | 11372 | 11163 | 16692 | 14557 |
| 3.8   | 5149  | 13728 | 13920 | 3.800 | 15066 | 11507 | 11305 | 16755 | 14832 |
| 3.85  | 5406  | 13817 | 14244 | 3.850 | 15342 | 11631 | 11446 | 16816 | 15097 |
| 3.91  | 5692  | 13901 | 14603 | 3.910 | 15632 | 11768 | 11613 | 16887 | 15399 |
| 3.94  | 5834  | 13947 | 14771 | 3.940 | 15769 | 11831 | 11711 | 16922 | 15544 |
| 4     | 6074  | 13995 | 15074 | 4.000 | 16017 | 11952 | 11853 | 16995 | 15821 |
| 4.1   | 6440  | 14067 | 15518 | 4.100 | 16367 | 12131 | 12105 | 17116 | 16239 |
| 4.202 | 6757  | 14117 | 15919 | 4.202 | 16660 | 12291 | 12340 | 17242 | 16610 |
| 4.301 | 7019  | 14152 | 16226 | 4.301 | 16919 | 12429 | 12547 | 17364 | 16868 |
| 4.4   | 7241  | 14180 | 16481 | 4.400 | 17059 | 12548 | 12719 | 17484 | 17191 |
| 4.5   | 7432  | 14203 | 16694 | 4.501 | 17222 | 12658 | 12888 | 17600 | 17412 |
| 4.6   | 7593  | 14225 | 16871 | 4.600 | 17360 | 12756 | 13036 | 17710 | 17594 |

|       |            |             |           |              |           |          |          |           |             |
|-------|------------|-------------|-----------|--------------|-----------|----------|----------|-----------|-------------|
| 4.7   | 7730       | 14246       | 17018     | 4.700        | 17477     | 12842    | 13163    | 17811     | 17746       |
| 4.8   | 7841       | 14265       | 17145     | 4.800        | 17577     | 12917    | 13272    | 17903     | 17871       |
| 4.9   | 7939       | 14284       | 17245     | 4.900        | 17663     | 12981    | 13363    | 17985     | 17974       |
| 5.01  | 8028       | 14303       | 17334     | 5.010        | 17742     | 13041    | 13446    | 18066     | 18065       |
| 5.1   | 8089       | 14318       | 17395     | 5.100        | 17797     | 13083    | 13504    | 18127     | 18122       |
| 5.201 | 8147       | 14334       | 17453     | 5.201        | 17851     | 13123    | 13559    | 18184     | 18179       |
| 5.3   | 8194       | 14349       | 17500     | 5.300        | 17902     | 13157    | 13604    | 18230     | 18228       |
| 5.4   | 8233       | 14362       | 17539     | 5.400        | 17942     | 13185    | 13642    | 18274     | 18265       |
| 5.5   | 8266       | 14374       | 17571     | 5.500        | 17976     | 13210    | 13674    | 18312     | 18295       |
| 5.6   | 8294       | 14386       | 17599     | 5.600        | 18006     | 13231    | 13701    | 18346     | 18319       |
| 5.7   | 8318       | 14397       | 17621     | 5.700        | 18032     | 13248    | 13724    | 18376     | 18338       |
| 5.8   | 8337       | 14408       | 17640     | 5.800        | 18055     | 13264    | 13744    | 18403     | 18354       |
| 5.9   | 8355       | 14417       | 17656     | 5.900        | 18076     | 13278    | 13760    | 18427     | 18368       |
| 6     | 8370       | 14427       | 17670     | 6.000        | 18094     | 13290    | 13775    | 18449     | 18379       |
| 7     | 8466       | 14513       | 17757     | 7.000        | 18215     | 13377    | 13868    | 18597     | 18445       |
| 8     | 8519       | 14571       | 17804     | 8.000        | 18280     | 13429    | 13919    | 18677     | 18482       |
| 9     | 8544       | 14599       | 17825     | 9.000        | 18311     | 13454    | 13942    | 18715     | 18498       |
| 10    | 8553       | 14609       | 17833     | 10.000       | 18323     | 13464    | 13951    | 18732     | 18502       |
| R(Å)  | $1_u(III)$ | $0_u^-(II)$ | $1_u(IV)$ | $0_u^-(III)$ | $2_u(II)$ | $1_u(V)$ | $3_u(I)$ | $1_u(VI)$ | $0_u^-(IV)$ |
| 1.701 | 219340     | 222012      | 226707    | 228410       | 229195    | 229196   | 230984   | 232567    | 237562      |
| 1.801 | 153763     | 156749      | 161187    | 162650       | 164570    | 164570   | 165612   | 166794    | 172187      |
| 1.850 | 130255     | 133234      | 137616    | 138957       | 140840    | 140840   | 142696   | 143106    | 148651      |
| 1.900 | 110521     | 113568      | 117848    | 119085       | 120881    | 120881   | 123225   | 123638    | 129066      |
| 1.950 | 94350      | 97410       | 101557    | 102752       | 104464    | 104464   | 106889   | 108048    | 113079      |
| 2.000 | 81036      | 84144       | 88232     | 89319        | 90902     | 90902    | 93457    | 95193     | 100209      |
| 2.050 | 70089      | 73236       | 77272     | 78248        | 79689     | 79689    | 82387    | 84569     | 89841       |
| 2.100 | 61084      | 64260       | 68249     | 69110        | 70344     | 70345    | 73255    | 75745     | 77670       |
| 2.150 | 53674      | 56880       | 60819     | 61560        | 62498     | 62498    | 65716    | 67855     | 68403       |
| 2.200 | 47603      | 51008       | 54697     | 55339        | 55679     | 55680    | 59511    | 59728     | 62491       |
| 2.250 | 42618      | 45951       | 49409     | 49650        | 50121     | 50128    | 53389    | 54355     | 56871       |
| 2.301 | 38420      | 25384       | 43580     | 44899        | 45447     | 45624    | 48508    | 49997     | 50707       |
| 2.350 | 35093      | 38073       | 38610     | 39209        | 41830     | 42094    | 44815    | 45878     | 45921       |
| 2.400 | 32293      | 33619       | 34218     | 35884        | 38248     | 39214    | 41345    | 41819     | 42067       |
| 2.450 | 29974      | 29655       | 30430     | 33494        | 34872     | 36760    | 37504    | 39248     | 39387       |
| 2.501 | 27068      | 26343       | 28094     | 31553        | 31761     | 34264    | 34700    | 37223     | 37564       |
| 2.550 | 24216      | 23613       | 26544     | 29977        | 29035     | 31605    | 32918    | 35725     | 36178       |
| 2.600 | 21815      | 21312       | 25196     | 28591        | 26715     | 29425    | 31272    | 34489     | 34998       |
| 2.650 | 19829      | 19387       | 23998     | 27347        | 24761     | 27707    | 29722    | 32826     | 33540       |
| 2.701 | 18125      | 17739       | 22907     | 26205        | 23061     | 26458    | 28217    | 31172     | 32156       |
| 2.750 | 16802      | 16406       | 21927     | 25270        | 21731     | 25666    | 26957    | 29954     | 30957       |
| 2.790 | 15955      | 15399       | 21007     | 24528        | 20883     | 24922    | 26155    | 28338     | 31777       |
| 2.850 | 14944      | 14112       | 19903     | 23643        | 19827     | 24288    | 25047    | 27041     | 30548       |
| 2.901 | 14469      | 13284       | 19173     | 23054        | 19103     | 23893    | 24278    | 26180     | 29410       |

|       |       |       |       |       |       |       |       |       |       |
|-------|-------|-------|-------|-------|-------|-------|-------|-------|-------|
| 2.950 | 14500 | 12989 | 18856 | 22691 | 18223 | 23594 | 23507 | 25519 | 28471 |
| 3.000 | 14742 | 13160 | 18435 | 22275 | 17709 | 23322 | 22985 | 25018 | 27657 |
| 3.050 | 15034 | 13540 | 18128 | 21941 | 17248 | 23065 | 22572 | 24662 | 27420 |
| 3.102 | 15342 | 13999 | 17944 | 21662 | 16863 | 22810 | 22239 | 24384 | 27406 |
| 3.150 | 15600 | 14432 | 17904 | 21451 | 16639 | 22619 | 22004 | 24186 | 27353 |
| 3.200 | 15831 | 14882 | 17982 | 21276 | 16503 | 22470 | 21821 | 24027 | 27254 |
| 3.250 | 16022 | 15325 | 18162 | 21141 | 16442 | 22364 | 21691 | 23902 | 27096 |
| 3.301 | 16183 | 15752 | 18418 | 21037 | 16440 | 22296 | 21608 | 23778 | 26875 |
| 3.350 | 16337 | 16162 | 18719 | 20960 | 16487 | 22261 | 21559 | 23713 | 26622 |
| 3.400 | 16488 | 16517 | 19043 | 20901 | 16576 | 22252 | 21540 | 23637 | 26354 |
| 3.451 | 16647 | 16907 | 19380 | 20858 | 16705 | 22266 | 21547 | 23567 | 26086 |
| 3.500 | 16809 | 17223 | 19695 | 20831 | 16859 | 22294 | 21573 | 23504 | 25841 |
| 3.550 | 16981 | 17513 | 20002 | 20817 | 17044 | 22331 | 21614 | 23443 | 25607 |
| 3.600 | 17159 | 17769 | 20288 | 20818 | 17252 | 22371 | 21665 | 23386 | 25393 |
| 3.650 | 17343 | 17993 | 20549 | 20833 | 17475 | 22409 | 21710 | 23338 | 25206 |
| 3.701 | 17530 | 18188 | 20788 | 20865 | 17726 | 22439 | 21771 | 23298 | 25084 |
| 3.750 | 17708 | 18346 | 20992 | 20912 | 17980 | 22459 | 21833 | 23271 | 25166 |
| 3.800 | 17886 | 18481 | 21176 | 20974 | 18251 | 22472 | 21899 | 23254 | 25322 |
| 3.850 | 18058 | 18592 | 21339 | 21050 | 18527 | 22480 | 21966 | 23248 | 25491 |
| 3.910 | 18254 | 18702 | 21513 | 21169 | 18849 | 22489 | 22041 | 23265 | 25699 |
| 3.940 | 18345 | 18746 | 21584 | 21225 | 19017 | 22486 | 22085 | 23264 | 25808 |
| 4.000 | 18523 | 18827 | 21727 | 21340 | 19347 | 22507 | 22168 | 23283 | 26005 |
| 4.100 | 18782 | 18931 | 21931 | 21561 | 19867 | 22546 | 22300 | 23323 | 26326 |
| 4.202 | 19005 | 19017 | 22113 | 21791 | 20351 | 22611 | 22427 | 23378 | 26626 |
| 4.301 | 19186 | 19090 | 22273 | 22008 | 20770 | 22688 | 22540 | 23441 | 26887 |
| 4.400 | 19331 | 19154 | 22418 | 22209 | 21146 | 22780 | 22648 | 23511 | 27093 |
| 4.501 | 19464 | 19219 | 22554 | 22403 | 21472 | 22865 | 22734 | 23585 | 27227 |
| 4.600 | 19577 | 19283 | 22677 | 22578 | 21751 | 22952 | 22812 | 23660 | 27318 |
| 4.700 | 19673 | 19342 | 22786 | 22735 | 21993 | 23036 | 22881 | 23733 | 27403 |
| 4.800 | 19755 | 19396 | 22880 | 22874 | 22202 | 23117 | 22944 | 23801 | 27485 |
| 4.900 | 19823 | 19445 | 22968 | 22994 | 22381 | 23194 | 23000 | 23863 | 27561 |
| 5.010 | 19887 | 19494 | 23046 | 23105 | 22549 | 23272 | 23053 | 23923 | 27637 |
| 5.100 | 19931 | 19529 | 23091 | 23180 | 22665 | 23330 | 23098 | 23967 | 27693 |
| 5.201 | 19974 | 19565 | 23128 | 23247 | 22777 | 23388 | 23146 | 24011 | 27749 |
| 5.300 | 20008 | 19595 | 23165 | 23294 | 22869 | 23435 | 23188 | 24050 | 27797 |
| 5.400 | 20037 | 19623 | 23194 | 23325 | 22949 | 23478 | 23220 | 24083 | 27840 |
| 5.500 | 20062 | 19647 | 23219 | 23344 | 23015 | 23514 | 23247 | 24112 | 27877 |
| 5.600 | 20083 | 19668 | 23241 | 23355 | 23072 | 23545 | 23269 | 24137 | 27909 |
| 5.700 | 20101 | 19686 | 23259 | 23363 | 23120 | 23566 | 23288 | 24158 | 27937 |
| 5.800 | 20116 | 19703 | 23276 | 23368 | 23161 | 23585 | 23303 | 24177 | 27961 |
| 5.900 | 20130 | 19718 | 23291 | 23372 | 23196 | 23604 | 23317 | 24193 | 27983 |
| 6.000 | 20141 | 19732 | 23304 | 23375 | 23226 | 23623 | 23329 | 24208 | 28001 |
| 7.000 | 20220 | 19831 | 23397 | 23420 | 23369 | 23734 | 23406 | 24304 | 28118 |



|        |       |       |       |       |       |       |       |       |       |
|--------|-------|-------|-------|-------|-------|-------|-------|-------|-------|
| 8.000  | 20267 | 19889 | 23453 | 23468 | 23421 | 23785 | 23464 | 24357 | 28176 |
| 9.000  | 20289 | 19917 | 23479 | 23497 | 23445 | 23807 | 23490 | 24382 | 28201 |
| 10.000 | 20297 | 19928 | 23489 | 23508 | 23454 | 23815 | 23498 | 24391 | 28210 |

**Table S2b.** The potential energy curves of the  $\Omega$  states for  $\text{Pb}_2(\text{cm}^{-1})$ .

| R(Å)  | $1_u(VII)$ | $F0_u^+(II)$ | $0_u^-(V)$ | $2_u(III)$ | $0_u^+(III)$ | $1_u(VIII)$ | $0_u^-(VI)$ | $2_u(IV)$ | $1_u(IX)$ | $3_u(II)$ |
|-------|------------|--------------|------------|------------|--------------|-------------|-------------|-----------|-----------|-----------|
| 1.701 | 237563     | 252349       | 252351     | 254321     | 256457       | 256458      | 256802      | 256885    | 259244    | 262592    |
| 1.801 | 172187     | 183787       | 183788     | 188378     | 188379       | 188447      | 190112      | 190618    | 193753    | 194194    |
| 1.850 | 148652     | 158402       | 158402     | 163134     | 163136       | 163524      | 163926      | 167864    | 168874    | 169340    |
| 1.900 | 129066     | 140644       | 140647     | 140875     | 142015       | 142028      | 142573      | 146232    | 146795    | 147032    |
| 1.950 | 113079     | 119909       | 119913     | 124322     | 124455       | 124456      | 125303      | 125335    | 128228    | 128867    |
| 2.000 | 100209     | 103503       | 103505     | 109475     | 109475       | 109592      | 109877      | 110049    | 110772    | 114802    |
| 2.050 | 89841      | 90401        | 90401      | 95877      | 95877        | 96530       | 96787       | 97715     | 97740     | 101953    |
| 2.100 | 80203      | 81530        | 81530      | 84441      | 84442        | 84812       | 87635       | 87644     | 87721     | 89116     |
| 2.150 | 72962      | 72991        | 73810      | 74991      | 75347        | 75347       | 79009       | 79365     | 79402     | 79936     |
| 2.200 | 64268      | 64290        | 65630      | 69746      | 70134        | 70134       | 70339       | 72110     | 73112     | 73223     |
| 2.250 | 56973      | 56973        | 58246      | 63011      | 63011        | 63878       | 64916       | 66071     | 67143     | 67712     |
| 2.301 | 51092      | 51092        | 53380      | 56636      | 56636        | 57463       | 58571       | 61716     | 62173     | 62287     |
| 2.350 | 45921      | 46478        | 49635      | 51435      | 51435        | 52173       | 53322       | 57296     | 57907     | 58355     |
| 2.400 | 42076      | 43394        | 45515      | 46969      | 46969        | 47634       | 48939       | 52987     | 53604     | 54434     |
| 2.450 | 39387      | 40630        | 41809      | 43371      | 43372        | 43944       | 45674       | 49274     | 49602     | 51186     |
| 2.501 | 37565      | 38008        | 38608      | 40274      | 40276        | 41118       | 43328       | 46104     | 46109     | 47653     |
| 2.550 | 36179      | 35519        | 35930      | 37809      | 37809        | 39045       | 41539       | 43047     | 43443     | 44397     |
| 2.600 | 35006      | 33165        | 33685      | 35953      | 35954        | 37461       | 39997       | 40367     | 41195     | 41772     |
| 2.650 | 33549      | 31043        | 31859      | 34601      | 34601        | 36180       | 38097       | 38564     | 39323     | 39726     |
| 2.701 | 32762      | 29493        | 30410      | 33511      | 33512        | 34989       | 36146       | 37263     | 37737     | 38065     |
| 2.750 | 31736      | 28321        | 29392      | 32863      | 32864        | 33346       | 34545       | 36112     | 36358     | 36694     |
| 2.790 | 31791      | 26550        | 28765      | 32290      | 32501        | 32501       | 33511       | 34754     | 35390     | 35712     |
| 2.850 | 31278      | 25200        | 28113      | 31307      | 31823        | 32033       | 32545       | 33453     | 34124     | 34263     |
| 2.901 | 30282      | 24297        | 27763      | 30962      | 30866        | 31751       | 32117       | 32578     | 33088     | 33290     |
| 2.950 | 29363      | 23567        | 27537      | 30615      | 30050        | 31520       | 31667       | 31988     | 32190     | 32433     |
| 3.000 | 28538      | 22991        | 27400      | 30235      | 29297        | 31059       | 31363       | 31486     | 31508     | 31690     |
| 3.050 | 27810      | 22551        | 26909      | 29783      | 28606        | 30508       | 30717       | 30961     | 31082     | 31215     |
| 3.102 | 27145      | 22227        | 26296      | 29263      | 27952        | 30021       | 30007       | 30547     | 30555     | 31075     |
| 3.150 | 26607      | 22045        | 25822      | 28782      | 27423        | 29656       | 29476       | 30254     | 30119     | 30948     |
| 3.200 | 26122      | 21965        | 25417      | 28314      | 26940        | 29347       | 29059       | 29990     | 29712     | 30809     |
| 3.250 | 25707      | 21984        | 25095      | 27887      | 26517        | 29092       | 28781       | 29740     | 29355     | 30658     |
| 3.301 | 25355      | 22089        | 24853      | 27500      | 26148        | 28851       | 28615       | 29490     | 29049     | 30496     |
| 3.350 | 25070      | 22262        | 24683      | 27157      | 25832        | 28669       | 28457       | 29238     | 28786     | 30318     |
| 3.400 | 24841      | 22489        | 24580      | 26847      | 25567        | 28452       | 28249       | 28983     | 28596     | 30134     |
| 3.451 | 24665      | 22749        | 24536      | 26564      | 25352        | 28238       | 28037       | 28712     | 28449     | 29944     |
| 3.500 | 24550      | 23002        | 24543      | 26319      | 25206        | 28053       | 27852       | 28494     | 28331     | 29767     |
| 3.550 | 24485      | 23230        | 24593      | 26094      | 25135        | 27886       | 27686       | 28282     | 28228     | 29593     |

|       |       |       |       |       |       |       |       |       |       |       |
|-------|-------|-------|-------|-------|-------|-------|-------|-------|-------|-------|
| 3.600 | 24470 | 23393 | 24678 | 25892 | 25165 | 27743 | 27543 | 28093 | 28141 | 29429 |
| 3.650 | 24510 | 23481 | 24806 | 25712 | 25303 | 27623 | 27439 | 27940 | 28068 | 29258 |
| 3.701 | 24580 | 23495 | 24886 | 25545 | 25593 | 27521 | 27338 | 27793 | 28008 | 29107 |
| 3.750 | 24677 | 23467 | 24793 | 25411 | 25798 | 27441 | 27258 | 27670 | 27962 | 28972 |
| 3.800 | 24803 | 23419 | 24648 | 25267 | 26077 | 27375 | 27192 | 27562 | 27925 | 28843 |
| 3.850 | 24950 | 23364 | 24508 | 25147 | 26355 | 27324 | 27140 | 27469 | 27897 | 28723 |
| 3.910 | 25151 | 23300 | 24366 | 25014 | 26665 | 27298 | 27113 | 27376 | 27876 | 28586 |
| 3.940 | 25246 | 23268 | 24276 | 24953 | 26806 | 27259 | 27073 | 27337 | 27861 | 28525 |
| 4.000 | 25460 | 23219 | 24151 | 24854 | 27057 | 27243 | 27054 | 27275 | 27849 | 28411 |
| 4.100 | 25817 | 23157 | 23967 | 24709 | 27380 | 27235 | 27045 | 27207 | 27839 | 28250 |
| 4.202 | 26164 | 23125 | 23819 | 24598 | 27600 | 27256 | 27069 | 27178 | 27845 | 28127 |
| 4.301 | 26473 | 23120 | 23710 | 24523 | 27738 | 27297 | 27120 | 27180 | 27864 | 28045 |
| 4.400 | 26736 | 23133 | 23629 | 24478 | 27826 | 27351 | 27203 | 27203 | 27891 | 27998 |
| 4.501 | 26983 | 23160 | 23569 | 24446 | 27877 | 27416 | 27362 | 27239 | 27928 | 27970 |
| 4.600 | 27192 | 23197 | 23528 | 24431 | 27910 | 27482 | 27544 | 27284 | 27991 | 27954 |
| 4.700 | 27366 | 23238 | 23500 | 24426 | 27935 | 27548 | 27708 | 27333 | 28038 | 27958 |
| 4.800 | 27507 | 23280 | 23483 | 24429 | 27959 | 27611 | 27850 | 27382 | 28092 | 27968 |
| 4.900 | 27617 | 23322 | 23473 | 24437 | 27980 | 27670 | 27972 | 27429 | 28147 | 27984 |
| 5.010 | 27708 | 23369 | 23471 | 24450 | 27998 | 27728 | 28085 | 27476 | 28215 | 28003 |
| 5.100 | 27763 | 23407 | 23474 | 24462 | 28010 | 27772 | 28164 | 27510 | 28270 | 28019 |
| 5.201 | 27813 | 23445 | 23486 | 24476 | 28022 | 27816 | 28240 | 27545 | 28325 | 28038 |
| 5.300 | 27856 | 23467 | 23505 | 24490 | 28049 | 27856 | 28302 | 27582 | 28344 | 28055 |
| 5.400 | 27890 | 23495 | 23531 | 24503 | 28061 | 27891 | 28356 | 27610 | 28383 | 28071 |
| 5.500 | 27919 | 23521 | 23562 | 24517 | 28072 | 27922 | 28401 | 27635 | 28417 | 28086 |
| 5.600 | 27943 | 23546 | 23593 | 24529 | 28081 | 27948 | 28439 | 27657 | 28447 | 28099 |
| 5.700 | 27964 | 23572 | 23623 | 24541 | 28089 | 27971 | 28472 | 27677 | 28474 | 28112 |
| 5.800 | 27981 | 23595 | 23650 | 24553 | 28096 | 27991 | 28499 | 27694 | 28497 | 28123 |
| 5.900 | 27995 | 23615 | 23674 | 24564 | 28103 | 28009 | 28523 | 27709 | 28517 | 28134 |
| 6.000 | 28008 | 23632 | 23696 | 24574 | 28109 | 28024 | 28544 | 27723 | 28535 | 28144 |
| 7.000 | 28092 | 23738 | 23832 | 24669 | 28165 | 28123 | 28668 | 27818 | 28649 | 28228 |
| 8.000 | 28141 | 23806 | 23897 | 24732 | 28209 | 28176 | 28729 | 27874 | 28708 | 28285 |
| 9.000 | 28163 | 23837 | 23927 | 24761 | 28233 | 28201 | 28758 | 27900 | 28735 | 28312 |
| 10.00 | 28171 | 23849 | 23939 | 24772 | 28243 | 28209 | 28769 | 27910 | 28745 | 28322 |

Table S3. The main configurations at  $R_e$  for the  $\Lambda$ -S states of  $Pb_2$ .

| Stat            | Main configurations at $R_e$ (%)                             |
|-----------------|--------------------------------------------------------------|
| e               |                                                              |
| $X^3\Sigma_g^-$ | $2\sigma_g^2\pi_u^2(89.54); 2\sigma_g^2\pi_g^2(3.17)$        |
| $A^3\Pi_u$      | $2\sigma_g^1\pi_u^3(84.28); 2\sigma_g^1\pi_u^1\pi_g^1(6.82)$ |

$$\begin{aligned}
a^1\Delta_g & 2\sigma_g^2\pi_u^2(86.05); 2\sigma_g^2\pi_g^2(7.33) \\
b^1\Sigma_g^+ & 2\sigma_g^2\pi_u^2(72.78); \pi_u^4(10.83); 2\sigma_g^2\pi_g^2(8.50) \\
c^1\Pi_u & 2\sigma_g^1\pi_u^3(82.57); 2\sigma_g^1\pi_u^1\pi_g^2(7.37) \\
1^5\Pi_g & 2\sigma_g^1\pi_u^2\pi_g^1(95.34); \\
d^1\Sigma_g^+ & \pi_u^4(62.14); 2\sigma_g^2\pi_u^2(10.43); \pi_u^2\pi_g^2(19.4); \pi_g^4(1.85) \\
1^1\Sigma_u^- & 2\sigma_g^2\pi_u^1\pi_g^1(92.58); \\
1^3\Delta_u & 2\sigma_g^2\pi_u^1\pi_g^1(92.34); \\
1^3\Sigma_u^+ & 2\sigma_g^2\pi_u^1\pi_g^1(77.20); \pi_u^3\pi_g^1(15.93) \\
D^3\Pi_g & 2\sigma_g^1\pi_u^2\pi_g^1(91.50); 2\sigma_g^1\pi_g^3(1.70) \\
1^1\Pi_g & 2\sigma_g^1\pi_u^2\pi_g^1(81.41); 2\sigma_u^1\pi_g^3(5.29) \\
2^3\Sigma_u^+ & \pi_u^3\pi_g^1(67.13); 2\sigma_g^1\pi_u^2\pi_g^1(16.58) \\
F^3\Sigma_u^- & 2\sigma_g^2\pi_u^1\pi_g^1(64.66); \pi_u^3\pi_g^1(11.04); 2\sigma_g^1\pi_u^12\sigma_u^1(16.18)
\end{aligned}$$


---

**Table S4a.** The  $\Lambda$ -S compositions for  $X0_g^+$  state.

| R(Å)  | $b^1\Sigma_g^+$ | $X^3\Sigma_g^-$ | $D^3\Pi_g$ | $4^3\Pi_g$ | $1^5\Delta_g$ | $1^5\Pi_g$ |
|-------|-----------------|-----------------|------------|------------|---------------|------------|
| 2.85  | 0.2255          | 0.4703          | 0.0542     | 0.0178     | 0.0034        | 0.1274     |
| 2.901 | 0.2315          | 0.4589          | 0.0568     | 0.0234     | 0.0044        | 0.1282     |
| 2.95  | 0.235           | 0.4473          | 0.0602     | 0.0274     | 0.0054        | 0.1302     |
| 3     | 0.2372          | 0.4353          | 0.064      | 0.0314     | 0.0066        | 0.133      |
| 3.05  | 0.2382          | 0.4228          | 0.0682     | 0.0352     | 0.008         | 0.1358     |
| 3.102 | 0.2383          | 0.4095          | 0.0732     | 0.0392     | 0.0094        | 0.139      |
| 3.15  | 0.2377          | 0.3969          | 0.0782     | 0.0426     | 0.011         | 0.1424     |
| 3.2   | 0.2364          | 0.3835          | 0.0838     | 0.0464     | 0.0132        | 0.146      |
| 3.25  | 0.2345          | 0.3698          | 0.0896     | 0.0502     | 0.0152        | 0.1496     |
| 3.3   | 0.2319          | 0.3559          | 0.096      | 0.054      | 0.0178        | 0.1534     |
| 3.35  | 0.2286          | 0.3413          | 0.1026     | 0.0576     | 0.0204        | 0.1572     |
| 3.4   | 0.2246          | 0.3265          | 0.1096     | 0.0614     | 0.0236        | 0.1612     |
| 3.451 | 0.2211          | 0.3133          | 0.116      | 0.0654     | 0.027         | 0.1646     |

|       |        |        |        |        |        |        |
|-------|--------|--------|--------|--------|--------|--------|
| 3.5   | 0.2167 | 0.2996 | 0.1224 | 0.0692 | 0.0308 | 0.1682 |
| 3.55  | 0.2118 | 0.2857 | 0.1286 | 0.073  | 0.0348 | 0.1716 |
| 3.6   | 0.2067 | 0.2721 | 0.1348 | 0.0764 | 0.039  | 0.1748 |
| 3.65  | 0.2013 | 0.2589 | 0.1404 | 0.08   | 0.0438 | 0.178  |
| 3.701 | 0.1956 | 0.2458 | 0.1458 | 0.0834 | 0.0486 | 0.1808 |
| 3.75  | 0.1901 | 0.2339 | 0.1506 | 0.0868 | 0.0538 | 0.183  |
| 3.8   | 0.1844 | 0.2222 | 0.155  | 0.0898 | 0.0592 | 0.1852 |
| 3.85  | 0.1788 | 0.2112 | 0.159  | 0.0928 | 0.0647 | 0.187  |
| 3.91  | 0.1722 | 0.1989 | 0.1632 | 0.096  | 0.0713 | 0.1888 |
| 3.94  | 0.1695 | 0.1933 | 0.1654 | 0.0978 | 0.0749 | 0.1882 |
| 4     | 0.1629 | 0.1822 | 0.1686 | 0.1004 | 0.0815 | 0.1906 |
| 4.1   | 0.1534 | 0.1662 | 0.173  | 0.1044 | 0.0925 | 0.1916 |
| 4.202 | 0.145  | 0.1525 | 0.1762 | 0.1078 | 0.1031 | 0.1918 |
| 4.301 | 0.1379 | 0.1413 | 0.1784 | 0.1104 | 0.1127 | 0.1916 |
| 4.4   | 0.132  | 0.132  | 0.1798 | 0.1126 | 0.1215 | 0.1908 |
| 4.5   | 0.1271 | 0.1242 | 0.1806 | 0.1142 | 0.1293 | 0.1898 |
| 4.6   | 0.1231 | 0.1177 | 0.181  | 0.1156 | 0.1361 | 0.1888 |
| 4.7   | 0.12   | 0.1125 | 0.181  | 0.1166 | 0.1419 | 0.1878 |
| 4.8   | 0.1178 | 0.1083 | 0.1808 | 0.1174 | 0.1469 | 0.1866 |

Table S4b. The  $\Lambda$ -S compositions for  $CO_u^+(I)$  state

| R(Å)  | $A^3\Pi_u$ | $2^3\Pi_u$ | $5^3\Pi_u$ | $F^3\Sigma_u^-$ | $1^5\Pi_u$ |
|-------|------------|------------|------------|-----------------|------------|
| 2.85  | 0.9456     | 0.0044     | 0.002      | 0.0031          | 0.008      |
| 2.901 | 0.9354     | 0.006      | 0.0024     | 0.0067          | 0.0108     |
| 2.95  | 0.9224     | 0.0082     | 0.0036     | 0.0116          | 0.0144     |
| 3     | 0.9052     | 0.0112     | 0.0052     | 0.0181          | 0.0194     |
| 3.05  | 0.8824     | 0.0154     | 0.0072     | 0.0268          | 0.0262     |
| 3.102 | 0.8522     | 0.021      | 0.0102     | 0.0383          | 0.0352     |
| 3.15  | 0.8174     | 0.0278     | 0.0138     | 0.0511          | 0.0458     |
| 3.2   | 0.7746     | 0.036      | 0.019      | 0.0663          | 0.0594     |
| 3.25  | 0.7258     | 0.0458     | 0.0252     | 0.0827          | 0.075      |
| 3.301 | 0.6736     | 0.0562     | 0.0324     | 0.0989          | 0.0922     |
| 3.35  | 0.6216     | 0.067      | 0.0406     | 0.1145          | 0.1102     |
| 3.4   | 0.5718     | 0.0774     | 0.049      | 0.1275          | 0.1278     |
| 3.451 | 0.5264     | 0.0868     | 0.0578     | 0.1381          | 0.1446     |
| 3.5   | 0.489      | 0.0948     | 0.066      | 0.1457          | 0.1592     |
| 3.55  | 0.4576     | 0.1014     | 0.0738     | 0.1509          | 0.172      |
| 3.6   | 0.4324     | 0.1062     | 0.0816     | 0.1539          | 0.1832     |
| 3.65  | 0.4128     | 0.1094     | 0.0884     | 0.1551          | 0.193      |
| 3.701 | 0.3978     | 0.1106     | 0.0948     | 0.1549          | 0.201      |
| 3.75  | 0.3876     | 0.1102     | 0.1004     | 0.1536          | 0.2076     |

|       |        |        |        |        |        |
|-------|--------|--------|--------|--------|--------|
| 3.8   | 0.3806 | 0.1082 | 0.1054 | 0.1515 | 0.2132 |
| 3.85  | 0.3768 | 0.1048 | 0.1098 | 0.1489 | 0.218  |
| 3.91  | 0.3752 | 0.0996 | 0.1144 | 0.1452 | 0.2224 |
| 3.94  | 0.3752 | 0.096  | 0.1162 | 0.1432 | 0.2246 |
| 4     | 0.3772 | 0.0888 | 0.1198 | 0.1391 | 0.2276 |
| 4.1   | 0.3828 | 0.0754 | 0.1238 | 0.1319 | 0.231  |
| 4.202 | 0.3892 | 0.0616 | 0.1258 | 0.124  | 0.232  |
| 4.301 | 0.3936 | 0.0494 | 0.1256 | 0.1159 | 0.2308 |
| 4.4   | 0.395  | 0.0392 | 0.1234 | 0.1075 | 0.2274 |
| 4.501 | 0.3932 | 0.0312 | 0.1198 | 0.0991 | 0.2226 |
| 4.6   | 0.3888 | 0.0254 | 0.1154 | 0.0913 | 0.2174 |
| 4.7   | 0.3834 | 0.0212 | 0.1112 | 0.0845 | 0.2126 |
| 4.8   | 0.3778 | 0.0182 | 0.1074 | 0.0788 | 0.2086 |

Table S4c. The  $\Lambda$ -S compositions for  $F0_u^+(II)$  state

| R( $\text{\AA}$ ) | $A^3\Pi_u$ | $2^3\Pi_u$ | $4^3\Pi_u$ | $5^3\Pi_u$ | $F^3\Sigma_u^-$ | $2^3\Sigma_u^-$ | $1^5\Pi_u$ |
|-------------------|------------|------------|------------|------------|-----------------|-----------------|------------|
| 2.85              | 0.0192     | 0.1114     | 0          | 6.92E-02   | 0.5522          | 0.0068          | 0.2398     |
| 2.901             | 0.0288     | 0.1148     | 0          | 0.0738     | 0.5299          | 0.0039          | 0.2482     |
| 2.95              | 0.041      | 0.117      | 0          | 0.0782     | 0.5059          | 0.0021          | 0.2552     |
| 3                 | 0.0574     | 0.1172     | 0          | 0.0822     | 0.481           | 9.00E-04        | 0.26       |
| 3.05              | 0.0788     | 0.1154     | 0          | 0.0858     | 0.4564          | 2.00E-04        | 0.2614     |
| 3.102             | 0.1076     | 0.111      | 0          | 0.0888     | 0.4293          | 0               | 0.26       |
| 3.15              | 0.1406     | 0.1058     | 0          | 0.0912     | 0.4             | 3.00E-04        | 0.2586     |
| 3.2               | 0.1812     | 0.0978     | 0          | 0.0928     | 0.3659          | 0.001           | 0.2566     |
| 3.25              | 0.227      | 0.0876     | 0          | 0.094      | 0.33            | 0.0024          | 0.2544     |
| 3.301             | 0.2744     | 0.0744     | 0          | 0.0942     | 0.2939          | 0.0047          | 0.253      |
| 3.35              | 0.322      | 0.0592     | 0          | 0.093      | 0.2573          | 0.0071          | 0.2544     |
| 3.4               | 0.3636     | 0.0416     | 0          | 0.0912     | 0.2221          | 0.0103          | 0.262      |
| 3.451             | 0.3956     | 0.0228     | 0          | 0.0882     | 0.1863          | 0.0142          | 0.2802     |
| 3.5               | 0.41       | 0.0066     | 0          | 0.083      | 0.1504          | 0.0187          | 0.3122     |
| 3.55              | 0.3994     | 2.00E-04   | 0          | 0.0736     | 0.111           | 0.0245          | 0.362      |
| 3.6               | 0.358      | 0.0154     | 0          | 0.0598     | 0.0716          | 0.0312          | 0.4206     |
| 3.65              | 0.2998     | 0.0524     | 0.0524     | 0.0446     | 0.0405          | 0.0378          | 0.4678     |
| 3.701             | 0.2438     | 0.0974     | 0.062      | 0.0316     | 0.0207          | 0.0437          | 0.4938     |
| 3.75              | 0.2056     | 0.1338     | 0.0672     | 0.0232     | 0.0108          | 0.0485          | 0.5022     |
| 3.8               | 0.1806     | 0.1606     | 0.0704     | 0.0176     | 0.0057          | 0.0527          | 0.5026     |
| 3.85              | 0.1656     | 0.1784     | 0.072      | 0.014      | 0.0031          | 0.0564          | 0.4994     |
| 3.91              | 0.1566     | 0.191      | 0.0728     | 0.011      | 0.0015          | 0.0605          | 0.4944     |
| 3.94              | 0.1544     | 0.1948     | 0.073      | 0.0098     | 0.001           | 0.0624          | 0.492      |
| 4                 | 0.1534     | 0.1982     | 0.073      | 0.0084     | 5.00E-04        | 0.066           | 0.4868     |
| 4.1               | 0.1586     | 0.1964     | 0.0728     | 0.0062     | 1.00E-04        | 0.0716          | 0.479      |

|       |        |        |        |        |          |        |        |
|-------|--------|--------|--------|--------|----------|--------|--------|
| 4.202 | 0.168  | 0.189  | 0.0724 | 0.0048 | 0        | 0.0767 | 0.4722 |
| 4.301 | 0.1788 | 0.1796 | 0.0718 | 0.0038 | 0        | 0.0812 | 0.4662 |
| 4.4   | 0.1894 | 0.1694 | 0.0712 | 0.003  | 1.00E-04 | 0.0853 | 0.461  |
| 4.501 | 0.1992 | 0.1596 | 0.0706 | 0.0022 | 3.00E-04 | 0.089  | 0.4564 |
| 4.6   | 0.2074 | 0.1512 | 0.07   | 0.0018 | 4.00E-04 | 0.0923 | 0.452  |
| 4.7   | 0.2142 | 0.1436 | 0.0692 | 0.001  | 6.00E-04 | 0.0951 | 0.4484 |

Table S4d. The  $\Lambda$ -S compositions for  $0_u^+$  (*III*) state.

| R(Å)  | $A^3\Pi_u$ | $2^3\Pi_u$ | $3^3\Pi_u$ | $5^3\Pi_u$ | $2^3\Sigma_u^-$ | $F^3\Sigma_u^-$ | $3^3\Sigma_u^-$ | $1^5\Pi_u$ |
|-------|------------|------------|------------|------------|-----------------|-----------------|-----------------|------------|
| 2.85  | 0.0058     | 0.008      | 0.0654     | 0.0178     | 0.0365          | 0.2821          | 0.0162          | 0.5618     |
| 2.95  | 0.0022     | 0.0658     | 0.0908     | 0.0092     | 0.0117          | 0.2249          | 0.0249          | 0.5614     |
| 3     | 0.0014     | 0.1072     | 0.0968     | 0.0054     | 0.0068          | 0.1973          | 0.029           | 0.5512     |
| 3.05  | 8.00E-04   | 0.1456     | 0.0982     | 0.0032     | 0.0039          | 0.1744          | 0.0319          | 0.5374     |
| 3.102 | 4.00E-04   | 0.1798     | 0.0966     | 0.0018     | 0.002           | 0.1563          | 0.0346          | 0.5226     |
| 3.15  | 0          | 0.2142     | 0.0952     | 8.00E-04   | 9.00E-04        | 0.14            | 0.0374          | 0.5048     |
| 3.2   | 0          | 0.2516     | 0.0932     | 0          | 3.00E-04        | 0.1245          | 0.0404          | 0.4828     |
| 3.25  | 0          | 0.2876     | 0.0908     | 0          | 0               | 0.1119          | 0.043           | 0.4592     |
| 3.301 | 8.00E-04   | 0.3214     | 0.0878     | 6.00E-04   | 1.00E-04        | 0.1029          | 0.0453          | 0.434      |
| 3.35  | 0.0022     | 0.352      | 0.0844     | 0.002      | 0.002           | 0.098           | 0.0469          | 0.4068     |
| 3.4   | 0.0062     | 0.38       | 0.0804     | 0.0044     | 0.002           | 0.0978          | 0.0481          | 0.3748     |
| 3.451 | 0.0148     | 0.406      | 0.0748     | 0.0082     | 0.002           | 0.1036          | 0.049           | 0.334      |
| 3.5   | 0.0332     | 0.4258     | 0.0674     | 0.015      | 0.0019          | 0.1166          | 0.0498          | 0.2822     |
| 3.55  | 0.0702     | 4.32E-01   | 0.0566     | 0.0266     | 0.0017          | 0.1384          | 0.0507          | 0.2144     |
| 3.6   | 0.1312     | 0.4142     | 0.0424     | 0.044      | 0.0015          | 0.1657          | 0.0516          | 0.1406     |
| 3.65  | 0.2012     | 0.368      | 0.0016     | 0.064      | 0.0018          | 0.1894          | 0.0519          | 0.0832     |
| 3.75  | 0.2984     | 0.2812     | 0.0012     | 0.098      | 1.00E-04        | 0.2166          | 0.056           | 0.0308     |
| 3.8   | 0.322      | 0.2414     | 4.00E-04   | 0.1156     | 0               | 0.232           | 0.0586          | 0.0198     |
| 3.85  | 0.3272     | 0.2072     | 0          | 0.1322     | 0               | 0.2462          | 0.0614          | 0.0166     |
| 3.91  | 0.3182     | 0.1718     | 0          | 0.1536     | 0               | 0.2645          | 0.0646          | 0.0172     |
| 3.94  | 0.309      | 0.1558     | 4.00E-04   | 0.165      | 0               | 0.2739          | 0.066           | 0.0188     |
| 4     | 0.2846     | 0.1266     | 4.00E-04   | 1.89E-01   | 0               | 0.2914          | 0.0681          | 0.0236     |
| 4.1   | 0.2372     | 0.0878     | 0          | 2.30E-01   | 0               | 0.3119          | 0.0694          | 0.0354     |
| 4.202 | 0.1918     | 0.058      | 4.00E-04   | 0.2684     | 6.00E-04        | 0.3183          | 0.0678          | 0.0488     |
| 4.301 | 0.1564     | 0.0386     | 0.0012     | 0.297      | 0.0041          | 0.3072          | 0.0634          | 0.0606     |
| 4.4   | 0.1272     | 0.0242     | 0.004      | 3.04E-01   | 0.0198          | 0.2713          | 0.0544          | 0.071      |
| 4.501 | 0.104      | 0.0134     | 0.008      | 2.76E-01   | 0.0591          | 0.2032          | 0.0394          | 0.0798     |
| 4.6   | 0.0926     | 0.0084     | 0.0104     | 2.39E-01   | 0.1005          | 0.1415          | 0.0265          | 0.0856     |
| 4.7   | 0.0896     | 0.0066     | 0.01       | 2.20E-01   | 0.1254          | 0.1083          | 0.0197          | 0.0882     |
| 4.8   | 0.0906     | 0.0062     | 0.0088     | 2.13E-01   | 0.1383          | 0.0922          | 0.0164          | 0.0894     |

|      |        |       |        |        |        |        |        |        |
|------|--------|-------|--------|--------|--------|--------|--------|--------|
| 2.85 | 0.0058 | 0.008 | 0.0654 | 0.0178 | 0.0365 | 0.2821 | 0.0162 | 0.5618 |
|------|--------|-------|--------|--------|--------|--------|--------|--------|

Table S5. The influence of non-adiabatic effect on energy for  $F_0^+(II)$  and  $0_u^+(III)$  states.

| Vibrational level $\nu$ | Adiabatic energy (cm <sup>-1</sup> ) | Non-adiabatic energy (cm <sup>-1</sup> ) | Differentials(cm <sup>-1</sup> ) |
|-------------------------|--------------------------------------|------------------------------------------|----------------------------------|
| $F_0^+(II)$             |                                      |                                          |                                  |
| 0                       | 22016                                | 22270                                    | -254                             |
| 1                       | 22126                                | 22377                                    | -250                             |
| 2                       | 22236                                | 22482                                    | -246                             |
| $0_u^+(III)$            |                                      |                                          |                                  |
| 0                       | 25191                                | 25118                                    | 73                               |
| 1                       | 25304                                | 25226                                    | 78                               |
| 2                       | 25418                                | 25334                                    | 84                               |

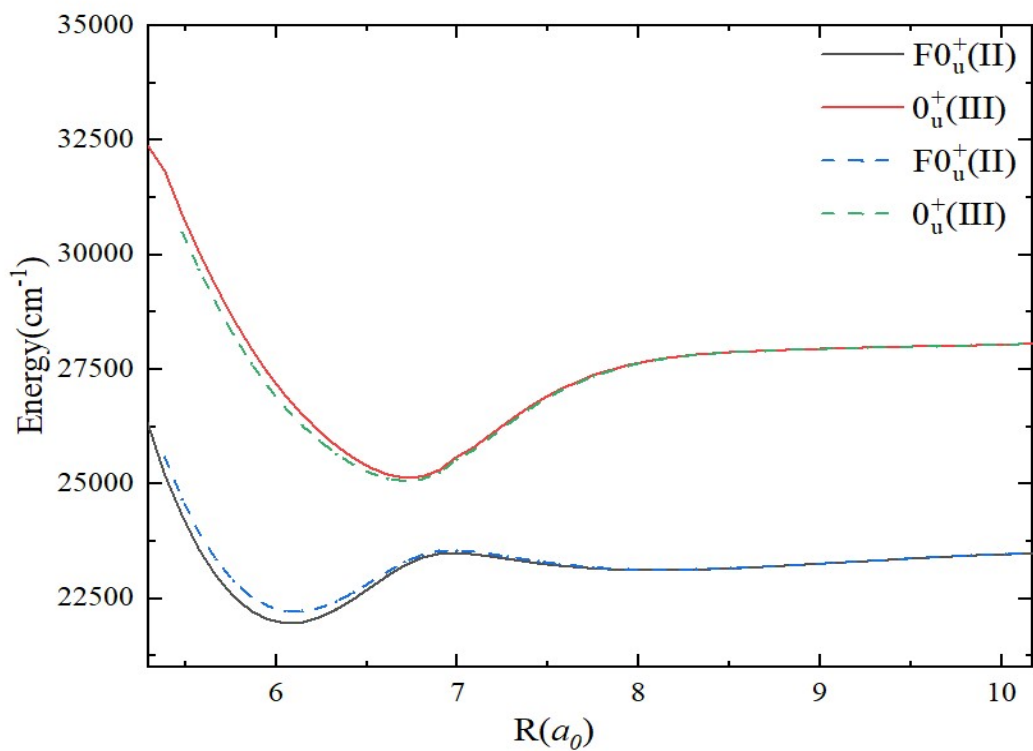

Figure S1, Potential energy curve in the adiabatic (solid line) and non-adiabatic (dotted line) representation.

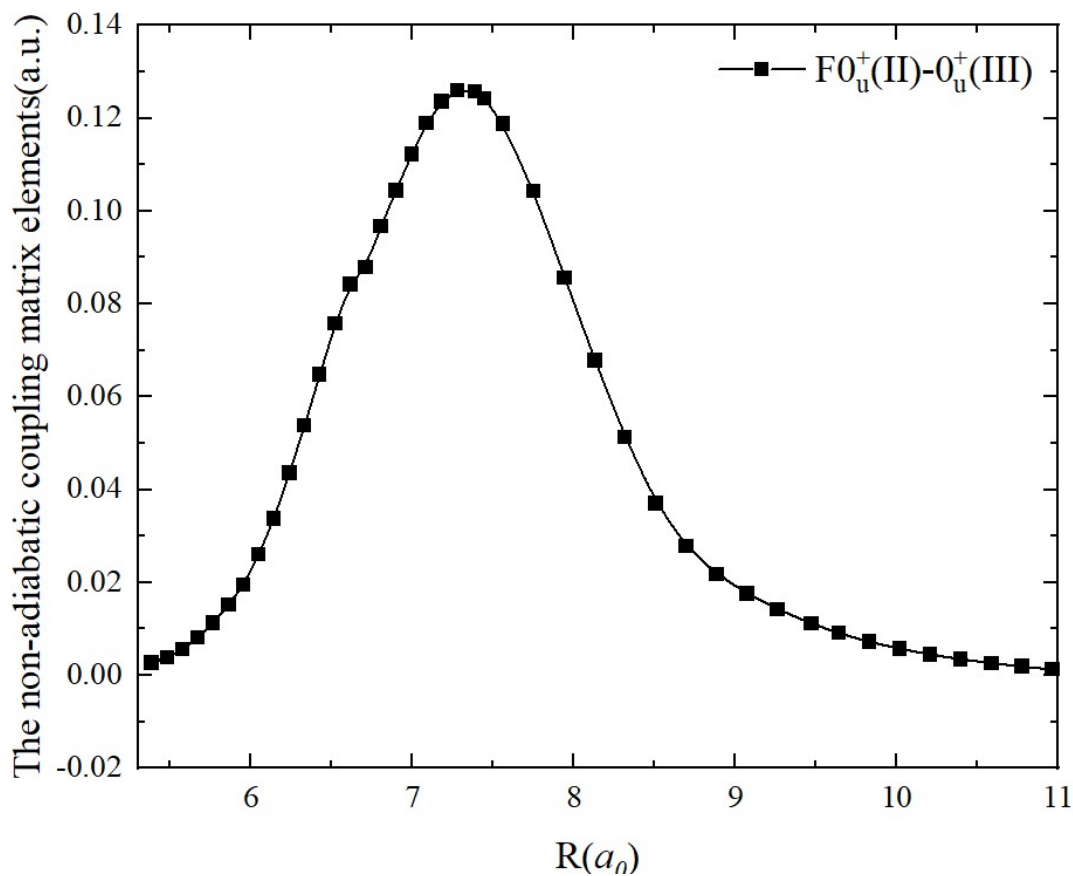

Figure S2, The non-adiabatic coupling matrix elements of between  $\text{F}^{0+}_u(\text{II})$  and  $\text{O}^{0+}_u(\text{III})$ .

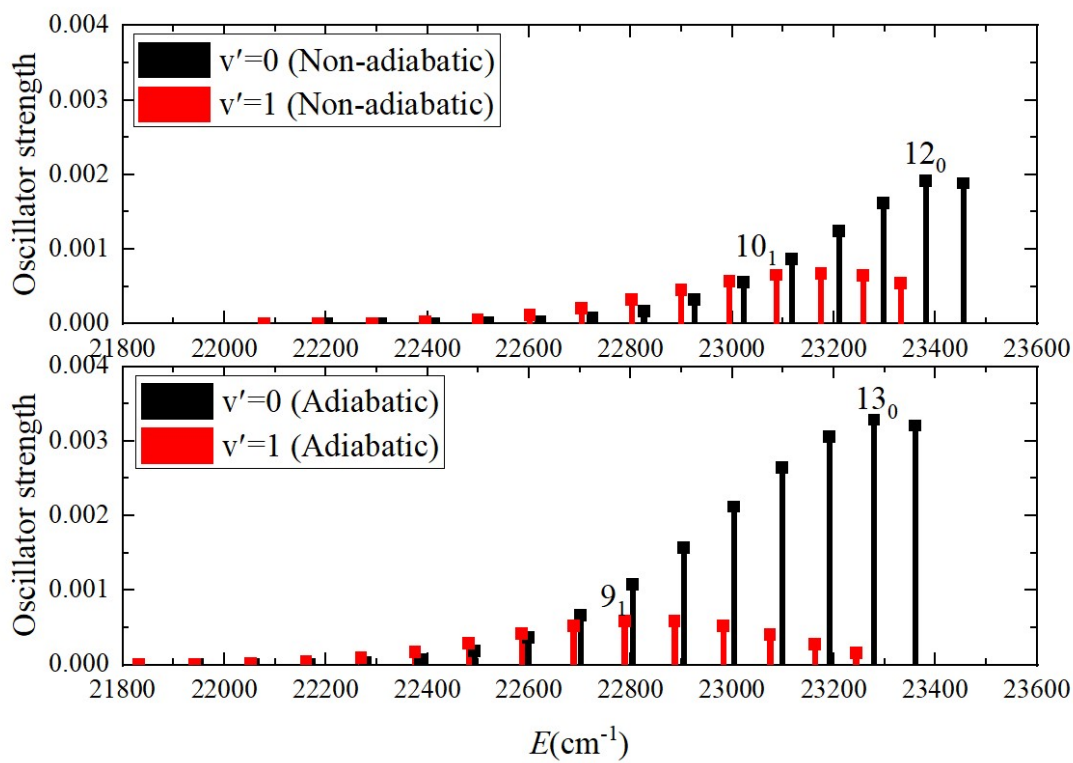

Figure S3, The oscillator strength of the  $X \rightarrow \text{F}^{0+}_u(\text{II})$  transition with the non-adiabatic and adiabatic.



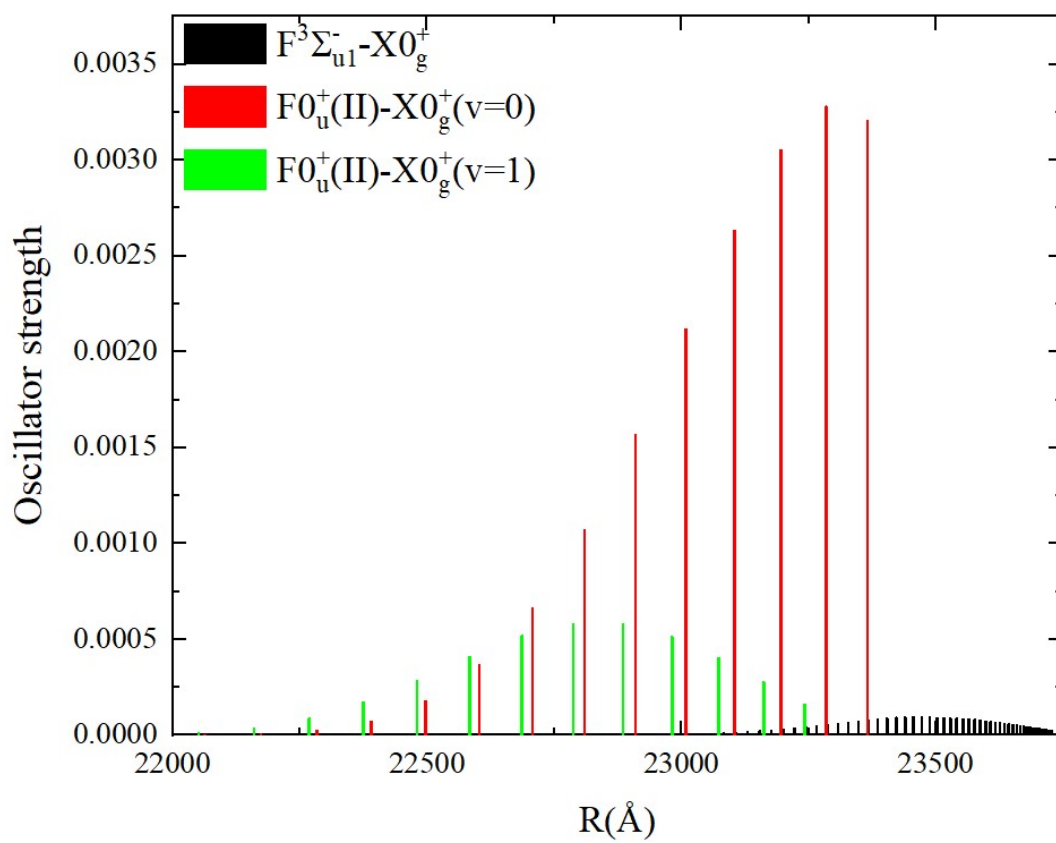

Figure S4, The oscillator strength of the  $X \rightarrow F^0_u^+(II), F^3\Sigma_{u1}^-$  transitions under the adiabatic.

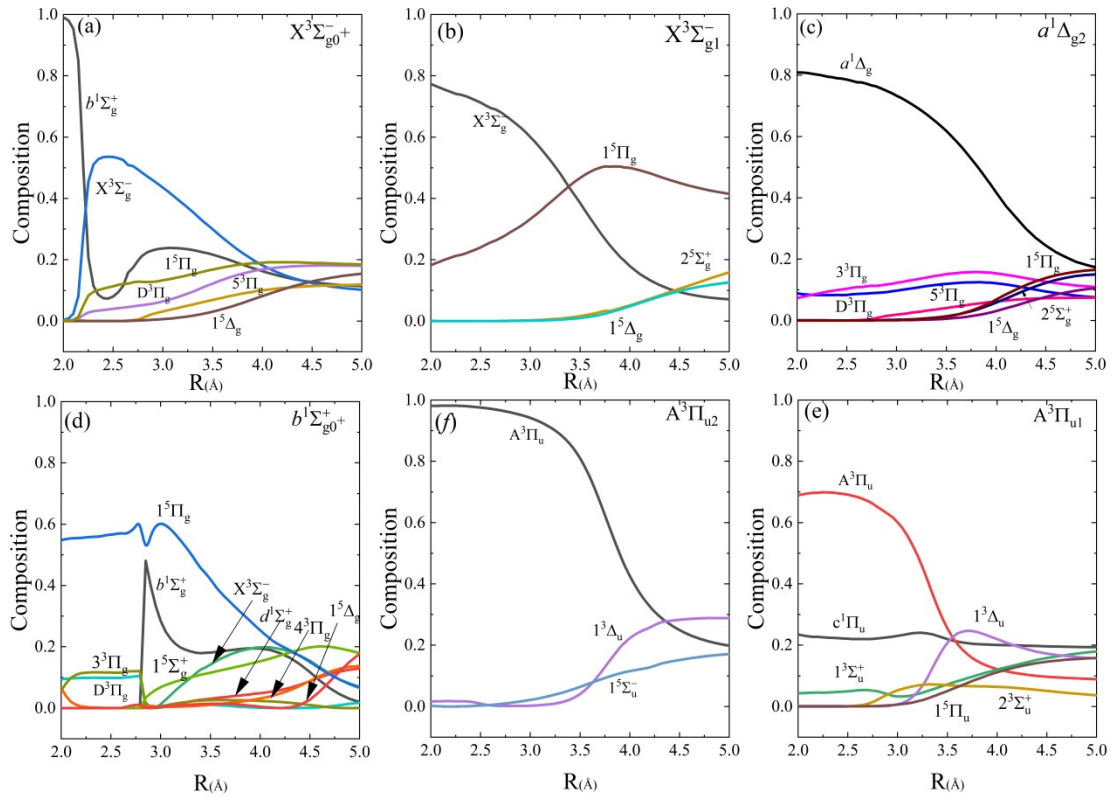

Figure S5. The  $\Lambda$ -S compositions for  $\Omega$  states.

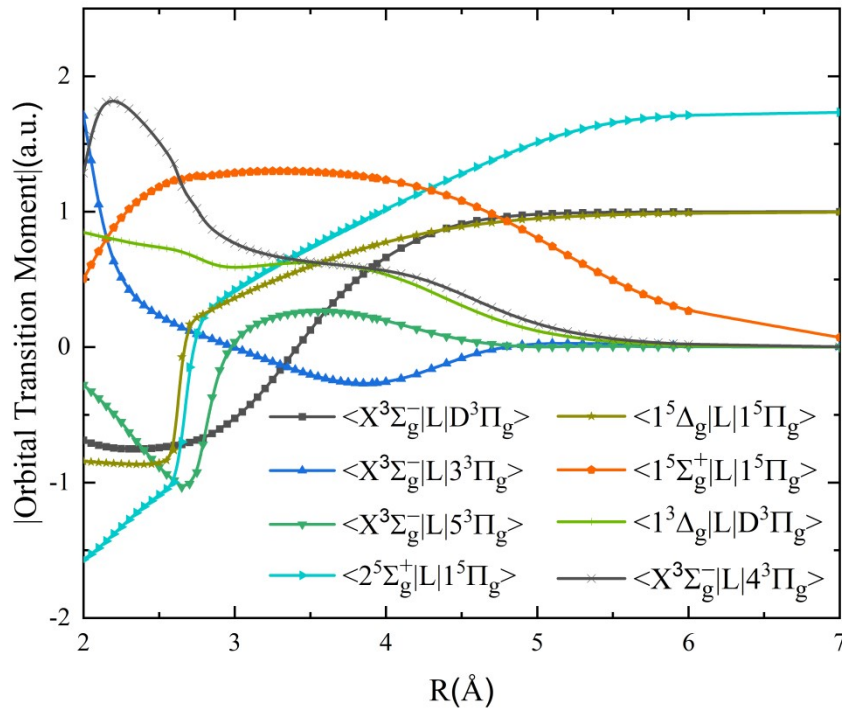

Fig.S6. The orbital contributions to magnetic transition moments of  $\Lambda$ -S states for  $Pb_2$ .

Table S6. The spectroscopic constants for the low-lying gerade states of Pb<sub>2</sub>.

| State              |                    | T <sub>e</sub> (cm <sup>-1</sup> ) | R <sub>e</sub> (Å) | ω <sub>e</sub> (cm <sup>-1</sup> ) | ω <sub>e</sub> x <sub>e</sub> (cm <sup>-1</sup> ) | B <sub>e</sub> (cm <sup>-1</sup> ) | D <sub>e</sub> (cm <sup>-1</sup> ) |
|--------------------|--------------------|------------------------------------|--------------------|------------------------------------|---------------------------------------------------|------------------------------------|------------------------------------|
| $X^3\Sigma_g^-$    | TW                 | 4778.9                             | 2.8992             | 132.2808                           | 0.5579                                            | 0.0194                             | 9585.9                             |
|                    | Cal. <sup>39</sup> | 4227                               | 3.049              | 107                                |                                                   |                                    |                                    |
|                    | Cal. <sup>42</sup> | 4150                               | 2.94               | 124                                |                                                   |                                    |                                    |
|                    | Exp. <sup>30</sup> | 5304.9                             | 2.900              | 120.57                             | 0.254                                             |                                    |                                    |
| $a^1\Delta_g$      | TW                 | 7800.1                             | 2.9328             | 127.8939                           | 0.3915                                            | 0.0189                             | 10032.8                            |
|                    | Cal. <sup>39</sup> | 8150                               | 3.068              | 111                                |                                                   |                                    |                                    |
|                    | Cal. <sup>42</sup> | 10130                              | 3.03               | 105                                |                                                   |                                    |                                    |
| $b^1\Sigma_{g0}^+$ | TW                 | 12596.5                            | 3.0556             | 83.4296                            | 0.4448                                            | 0.0174                             | 5291.1                             |
|                    | Cal. <sup>39</sup> | 11886                              | 3.275              | 72                                 |                                                   |                                    |                                    |
|                    | Cal. <sup>42</sup> | 13640                              | 3.18               | 74                                 |                                                   |                                    |                                    |

Table S7. From the theoretical point of view, the magnetic dipole moment transitions ( $b^1\Sigma_{g0}^+ \rightarrow X^3\Sigma_g^-$  and  $a^1\Delta_g \rightarrow$

$X^3\Sigma_g^-$ ) band can be observed experimentally.

| $b^1\Sigma_{g0}^+ \rightarrow X^3\Sigma_g^-$ |     |                     |                   | $a^1\Delta_g \rightarrow X^3\Sigma_g^-$ |     |                     |                   |
|----------------------------------------------|-----|---------------------|-------------------|-----------------------------------------|-----|---------------------|-------------------|
| v'                                           | v'' | ΔE/cm <sup>-1</sup> | A/s <sup>-1</sup> | v'                                      | v'' | ΔE/cm <sup>-1</sup> | A/s <sup>-1</sup> |
| 0                                            | 0   | 7673.9              | 1.60              | 0                                       | 0   | 3147.0              | 2.81E-03          |
| 0                                            | 1   | 7439.6              | 4.44              | 0                                       | 1   | 3016.7              | 2.19E-05          |
| 0                                            | 2   | 7214.7              | 4.25              | 0                                       | 2   | 2886.2              | 1.00E-05          |
| 0                                            | 3   | 6996.9              | 2.16              | 0                                       | 3   | 2756.4              | 1.34E-06          |
| 0                                            | 4   | 6785.3              | 7.03E-01          | 0                                       | 4   | 2627.3              | 2.81E-08          |
| 0                                            | 5   | 6579.1              | 1.61E-01          | 0                                       | 5   | 2499.2              | 3.01E-09          |
| 0                                            | 6   | 6377.7              | 2.76E-02          | 0                                       | 6   | 2372.6              | 8.65E-11          |
| 0                                            | 7   | 6180.8              | 3.65E-03          | 0                                       | 7   | 2248.0              | 3.85E-10          |
| 0                                            | 8   | 5987.9              | 3.62E-04          | 0                                       | 8   | 2125.7              | 6.13E-11          |
| 0                                            | 9   | 5799.0              | 3.63E-05          | 0                                       | 9   | 2004.9              | 3.04E-11          |
| 0                                            | 10  | 5613.7              | 1.26 E-06         | 0                                       | 10  | 1885.2              | 1.58E-10          |
|                                              |     |                     |                   | 0                                       | 11  | 1766.1              | 5.96E-11          |
|                                              |     |                     |                   | 0                                       | 12  | 1647.5              | 4.02E-11          |
